# Supplementary material for: Roles of TLR7 in Activation of NF-κB Signaling of Keratinocytes by Imiquimod
Source: PubMed Central journal article supplement (PMC3795621; doi:10.1371/journal.pone.0077159), 2013-10-11

Figure S3

**A**

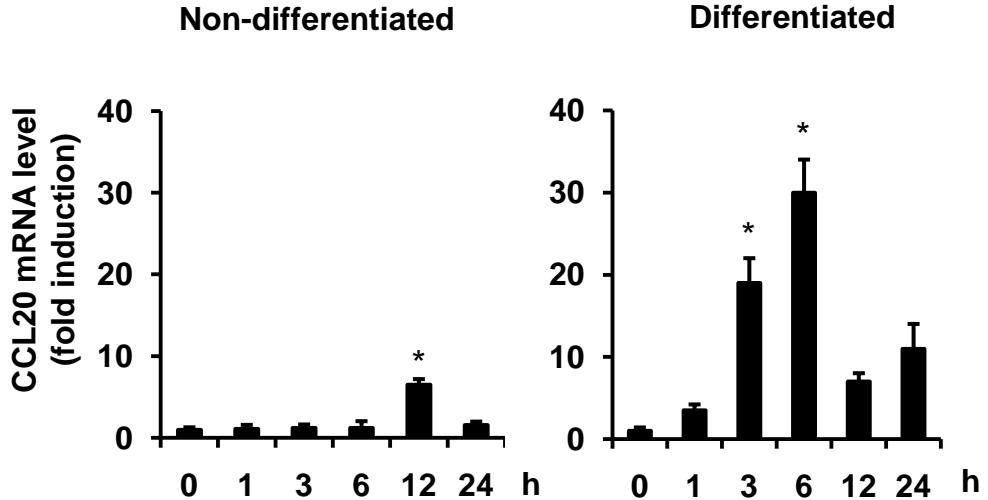

**B**

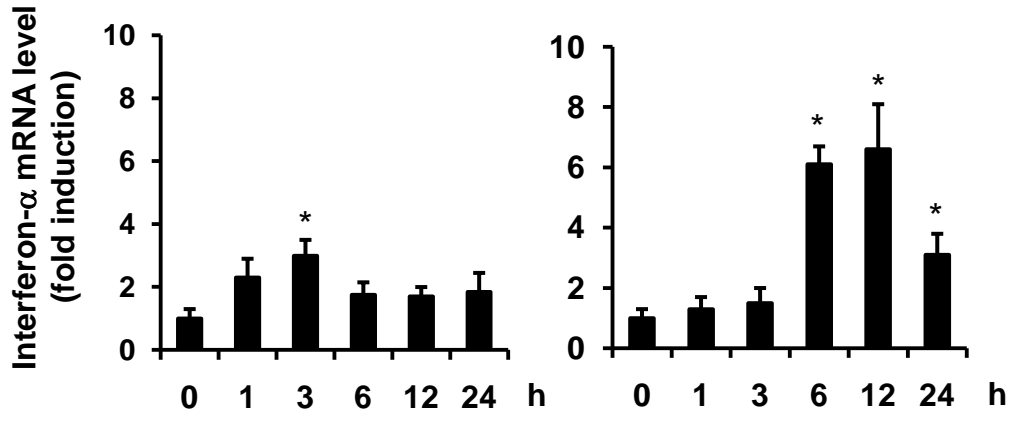

**C**

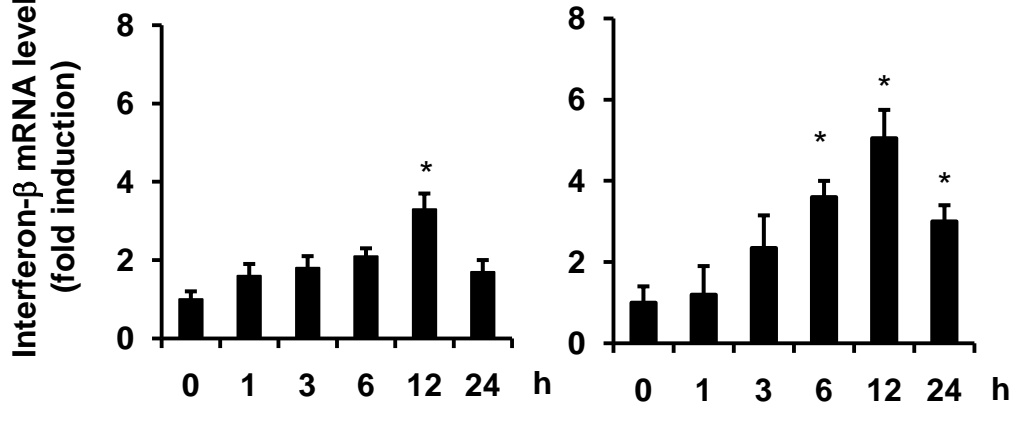

Supplement: pone.0077159.s003.pdf [file pone.0077159.s003.pdf]
